# Supplementary material
Source: PubMed Central journal article supplement (PMC2705030)
Supplement: pp.109.136242_1.pdf [file pp.109.136242_1.pdf]

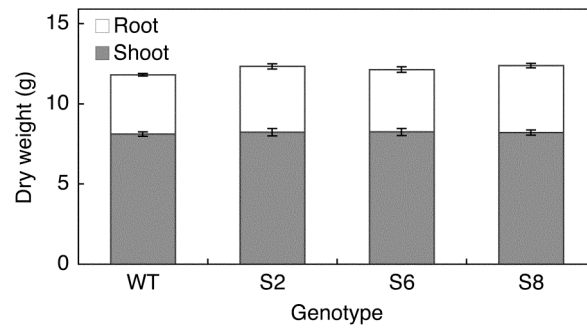

**Supplemental Figure 1.** Biomass accumulation of *N. sylvestris* lines. Plants were grown at  $500 \mu\text{mol m}^{-2} \text{s}^{-1}$  light for 7 weeks. Dry weight was determined after that 2 g (fresh weight) of shoot tissue had been removed from each plant for other analyses. Data are shown as means  $\pm$  SEM for 6 plants.

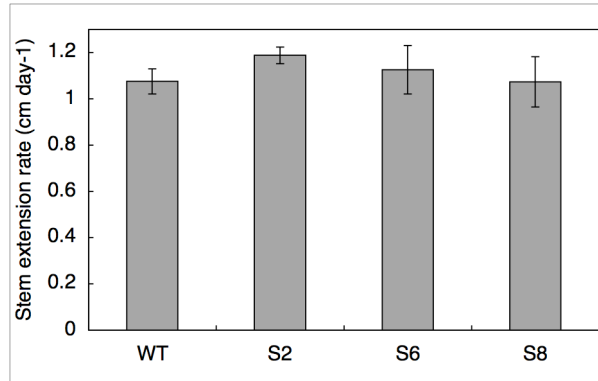

**Supplemental Figure 2.** Stem extension rates in *N. sylvestris* lines. The extension rate was determined at 8 cm height of the stem. The graph shows the average  $\pm$  SEM for four growth experiments, each constituting 3-6 plants of each transgenic line.

**Supplemental Table 1.** Relative metabolite content of fully expanded leaves from *N. sylvestris*. Metabolites were determined as described in the Materials and Methods. Data are normalised with respect to the mean response calculated for the wild type. Values are presented as mean  $\pm$  SE of determinations on six individual plants per line. Values set in bold type were determined by the *t*-test to be significantly different ( $P < 0.05$ ) from the wild type.

| Metabolites                  | WT              | S2                                | S6                                | S8                                |
|------------------------------|-----------------|-----------------------------------|-----------------------------------|-----------------------------------|
| Alanine                      | 1.00 $\pm$ 0.16 | 0.86 $\pm$ 0.08                   | 0.82 $\pm$ 0.08                   | 0.84 $\pm$ 0.07                   |
| $\beta$ -alanine             | 1.00 $\pm$ 0.13 | 0.85 $\pm$ 0.06                   | 0.87 $\pm$ 0.05                   | 1.00 $\pm$ 0.08                   |
| Valine                       | 1.00 $\pm$ 0.04 | 1.16 $\pm$ 0.07                   | 1.00 $\pm$ 0.07                   | 0.94 $\pm$ 0.08                   |
| Proline                      | 1.00 $\pm$ 0.16 | 0.81 $\pm$ 0.08                   | 0.94 $\pm$ 0.10                   | 1.14 $\pm$ 0.26                   |
| Serine                       | 1.00 $\pm$ 0.12 | 0.84 $\pm$ 0.07                   | 0.93 $\pm$ 0.04                   | 1.11 $\pm$ 0.06                   |
| Isoleucine                   | 1.00 $\pm$ 0.09 | 1.38 $\pm$ 0.14                   | 1.20 $\pm$ 0.14                   | 0.93 $\pm$ 0.16                   |
| Phenylalanine                | 1.00 $\pm$ 0.08 | 1.05 $\pm$ 0.05                   | 0.99 $\pm$ 0.02                   | 1.03 $\pm$ 0.08                   |
| Glycine                      | 1.00 $\pm$ 0.06 | 0.99 $\pm$ 0.05                   | 0.87 $\pm$ 0.05                   | 0.91 $\pm$ 0.05                   |
| Threonine                    | 1.00 $\pm$ 0.12 | 1.13 $\pm$ 0.04                   | 1.25 $\pm$ 0.06                   | 0.94 $\pm$ 0.05                   |
| Allo-threonine               | 1.00 $\pm$ 0.12 | 1.14 $\pm$ 0.04                   | 1.26 $\pm$ 0.06                   | 0.95 $\pm$ 0.05                   |
| Gamma-amino butyrate         | 1.00 $\pm$ 0.17 | 0.85 $\pm$ 0.11                   | 1.01 $\pm$ 0.17                   | 1.12 $\pm$ 0.16                   |
| Glycolate                    | 1.00 $\pm$ 0.02 | 0.92 $\pm$ 0.04                   | 0.91 $\pm$ 0.03                   | <b>0.90 <math>\pm</math> 0.03</b> |
| Glycerate                    | 1.00 $\pm$ 0.04 | <b>1.15 <math>\pm</math> 0.05</b> | 1.01 $\pm$ 0.03                   | 1.09 $\pm$ 0.09                   |
| 2-Oxoglutarate               | 1.00 $\pm$ 0.12 | 0.95 $\pm$ 0.06                   | 0.87 $\pm$ 0.08                   | 0.84 $\pm$ 0.07                   |
| Succinate                    | 1.00 $\pm$ 0.10 | 0.89 $\pm$ 0.03                   | 0.84 $\pm$ 0.04                   | 0.85 $\pm$ 0.04                   |
| Fumarate                     | 1.00 $\pm$ 0.08 | 0.93 $\pm$ 0.05                   | 0.97 $\pm$ 0.07                   | 0.94 $\pm$ 0.04                   |
| Maleate                      | 1.00 $\pm$ 0.11 | 0.74 $\pm$ 0.10                   | 0.75 $\pm$ 0.10                   | 0.84 $\pm$ 0.08                   |
| Citrate                      | 1.00 $\pm$ 0.08 | 0.99 $\pm$ 0.07                   | 1.29 $\pm$ 0.22                   | 1.29 $\pm$ 0.15                   |
| Malate                       | 1.00 $\pm$ 0.03 | <b>1.17 <math>\pm</math> 0.06</b> | 1.04 $\pm$ 0.04                   | 1.12 $\pm$ 0.09                   |
| Threonate                    | 1.00 $\pm$ 0.03 | 1.10 $\pm$ 0.06                   | 0.97 $\pm$ 0.05                   | 1.09 $\pm$ 0.10                   |
| Nicotinate                   | 1.00 $\pm$ 0.10 | 0.93 $\pm$ 0.02                   | 0.86 $\pm$ 0.04                   | 0.96 $\pm$ 0.07                   |
| 2-methyl-malate              | 1.00 $\pm$ 0.11 | <b>0.60 <math>\pm</math> 0.07</b> | 0.96 $\pm$ 0.06                   | 1.19 $\pm$ 0.08                   |
| Dehydroascorbate             | 1.00 $\pm$ 0.07 | 1.14 $\pm$ 0.11                   | 1.05 $\pm$ 0.09                   | 0.97 $\pm$ 0.03                   |
| Ascorbate                    | 1.00 $\pm$ 0.04 | 1.29 $\pm$ 0.24                   | 0.90 $\pm$ 0.04                   | 1.04 $\pm$ 0.09                   |
| Shikimate                    | 1.00 $\pm$ 0.04 | <b>1.28 <math>\pm</math> 0.05</b> | <b>1.25 <math>\pm</math> 0.04</b> | <b>1.20 <math>\pm</math> 0.07</b> |
| Caffeic acid (trans)         | 1.00 $\pm$ 0.12 | 0.84 $\pm$ 0.13                   | 0.83 $\pm$ 0.13                   | 0.88 $\pm$ 0.09                   |
| Caffeoyl quinic acid (cis)   | 1.00 $\pm$ 0.15 | 0.86 $\pm$ 0.04                   | 0.75 $\pm$ 0.08                   | 0.66 $\pm$ 0.06                   |
| Caffeoyl quinic acid (trans) | 1.00 $\pm$ 0.06 | 1.08 $\pm$ 0.05                   | 1.03 $\pm$ 0.08                   | 1.29 $\pm$ 0.12                   |
| Galactonic acid-1,4-lactone  | 1.00 $\pm$ 0.06 | 1.06 $\pm$ 0.03                   | 1.06 $\pm$ 0.04                   | 0.98 $\pm$ 0.01                   |
| Fructose                     | 1.00 $\pm$ 0.06 | <b>1.32 <math>\pm</math> 0.05</b> | 1.14 $\pm$ 0.04                   | 1.11 $\pm$ 0.08                   |
| Raffinose                    | 1.00 $\pm$ 0.12 | 0.69 $\pm$ 0.06                   | 0.77 $\pm$ 0.09                   | 0.80 $\pm$ 0.05                   |
| Maltotriose                  | 1.00 $\pm$ 0.08 | 1.24 $\pm$ 0.10                   | 0.96 $\pm$ 0.10                   | 0.85 $\pm$ 0.08                   |
| Sorbose                      | 1.00 $\pm$ 0.03 | 1.13 $\pm$ 0.05                   | 1.03 $\pm$ 0.02                   | 1.14 $\pm$ 0.08                   |
| Maltose                      | 1.00 $\pm$ 0.07 | 0.88 $\pm$ 0.04                   | <b>0.79 <math>\pm</math> 0.03</b> | 1.00 $\pm$ 0.04                   |
| Trehalose                    | 1.00 $\pm$ 0.07 | 1.02 $\pm$ 0.04                   | 0.92 $\pm$ 0.02                   | 0.94 $\pm$ 0.02                   |
| Isomaltose                   | 1.00 $\pm$ 0.03 | 0.96 $\pm$ 0.10                   | 0.77 $\pm$ 0.10                   | 0.84 $\pm$ 0.07                   |
| Xylose                       | 1.00 $\pm$ 0.08 | 1.05 $\pm$ 0.04                   | 0.91 $\pm$ 0.07                   | 0.91 $\pm$ 0.02                   |
| Sorbitol                     | 1.00 $\pm$ 0.03 | <b>1.15 <math>\pm</math> 0.05</b> | 1.03 $\pm$ 0.02                   | 1.12 $\pm$ 0.08                   |
| Galactinol                   | 1.00 $\pm$ 0.15 | 0.97 $\pm$ 0.15                   | 0.90 $\pm$ 0.06                   | 0.88 $\pm$ 0.12                   |
| Glycerol                     | 1.00 $\pm$ 0.05 | 1.10 $\pm$ 0.14                   | 0.92 $\pm$ 0.02                   | 0.86 $\pm$ 0.05                   |
| Myo-inositol,                | 1.00 $\pm$ 0.05 | 1.20 $\pm$ 0.08                   | 1.01 $\pm$ 0.06                   | 1.20 $\pm$ 0.13                   |
| Glucose-6-phosphate          | 1.00 $\pm$ 0.13 | 1.12 $\pm$ 0.10                   | 0.84 $\pm$ 0.10                   | 0.86 $\pm$ 0.12                   |
| Phosphoric acid              | 1.00 $\pm$ 0.18 | 1.30 $\pm$ 0.12                   | 1.18 $\pm$ 0.19                   | 1.00 $\pm$ 0.15                   |
| 4-hydroxy-pyridine           | 1.00 $\pm$ 0.05 | 0.99 $\pm$ 0.09                   | 0.87 $\pm$ 0.05                   | 0.89 $\pm$ 0.04                   |
| Urea                         | 1.00 $\pm$ 0.12 | 0.81 $\pm$ 0.08                   | 0.81 $\pm$ 0.09                   | 0.78 $\pm$ 0.08                   |
| Benzoic acid                 | 1.00 $\pm$ 0.02 | 1.10 $\pm$ 0.03                   | 0.99 $\pm$ 0.03                   | 1.09 $\pm$ 0.08                   |

**Supplemental Table 2.** Relative metabolite content of stems from *N.sylvestris*. Metabolites were determined as described in the Materials and Methods. Data are normalised with respect to the mean response calculated for the wild type. Values are presented as mean  $\pm$  SE of determinations on six individual plants per line. Values set in bold type were determined by *t*-test to be significantly different ( $P < 0.05$ ) from the wild type.

| Metabolites                | WT              | S2                                | S6                                | S8                                |
|----------------------------|-----------------|-----------------------------------|-----------------------------------|-----------------------------------|
| Alanine                    | 1.00 $\pm$ 0.12 | 0.84 $\pm$ 0.12                   | 0.70 $\pm$ 0.05                   | <b>0.63 <math>\pm</math> 0.06</b> |
| $\beta$ -alanine           | 1.00 $\pm$ 0.06 | 0.88 $\pm$ 0.04                   | 0.86 $\pm$ 0.05                   | 0.90 $\pm$ 0.05                   |
| Valine                     | 1.00 $\pm$ 0.10 | 0.88 $\pm$ 0.07                   | 1.08 $\pm$ 0.06                   | 0.96 $\pm$ 0.07                   |
| Proline                    | 1.00 $\pm$ 0.09 | <b>0.64 <math>\pm</math> 0.05</b> | 0.81 $\pm$ 0.08                   | 0.90 $\pm$ 0.12                   |
| Serine                     | 1.00 $\pm$ 0.05 | 0.86 $\pm$ 0.04                   | 0.95 $\pm$ 0.04                   | 0.96 $\pm$ 0.04                   |
| O-acetyl-serine            | 1.00 $\pm$ 0.13 | 0.83 $\pm$ 0.04                   | 0.93 $\pm$ 0.07                   | 0.75 $\pm$ 0.07                   |
| Isoleucine                 | 1.00 $\pm$ 0.11 | 1.16 $\pm$ 0.13                   | <b>1.48 <math>\pm</math> 0.15</b> | 1.24 $\pm$ 0.16                   |
| Methionine                 | 1.00 $\pm$ 0.08 | 1.04 $\pm$ 0.08                   | 1.02 $\pm$ 0.04                   | 1.14 $\pm$ 0.14                   |
| Glutamate                  | 1.00 $\pm$ 0.05 | <b>0.79 <math>\pm</math> 0.04</b> | <b>0.81 <math>\pm</math> 0.03</b> | 0.92 $\pm$ 0.10                   |
| Threonate                  | 1.00 $\pm$ 0.06 | 0.98 $\pm$ 0.06                   | 1.07 $\pm$ 0.07                   | 0.94 $\pm$ 0.09                   |
| Glycerate                  | 1.00 $\pm$ 0.07 | 1.10 $\pm$ 0.04                   | 1.17 $\pm$ 0.09                   | 0.86 $\pm$ 0.05                   |
| Gamma-amino buturate       | 1.00 $\pm$ 0.05 | 0.91 $\pm$ 0.07                   | 0.83 $\pm$ 0.05                   | 0.95 $\pm$ 0.10                   |
| Succinate                  | 1.00 $\pm$ 0.05 | 1.04 $\pm$ 0.07                   | 1.03 $\pm$ 0.05                   | 0.99 $\pm$ 0.08                   |
| Fumarate                   | 1.00 $\pm$ 0.12 | 1.05 $\pm$ 0.14                   | 1.08 $\pm$ 0.17                   | 0.91 $\pm$ 0.11                   |
| 2-oxoglutarate             | 1.00 $\pm$ 0.04 | 1.06 $\pm$ 0.03                   | 0.94 $\pm$ 0.05                   | <b>0.87 <math>\pm</math> 0.02</b> |
| Malate                     | 1.00 $\pm$ 0.06 | 0.99 $\pm$ 0.02                   | 1.13 $\pm$ 0.06                   | 1.01 $\pm$ 0.05                   |
| Citrate                    | 1.00 $\pm$ 0.09 | 1.14 $\pm$ 0.08                   | 1.02 $\pm$ 0.08                   | 0.91 $\pm$ 0.08                   |
| Pyroglutamate              | 1.00 $\pm$ 0.04 | 0.89 $\pm$ 0.04                   | 0.93 $\pm$ 0.03                   | 1.04 $\pm$ 0.05                   |
| Shikimate                  | 1.00 $\pm$ 0.07 | 0.94 $\pm$ 0.06                   | 1.05 $\pm$ 0.08                   | 0.89 $\pm$ 0.09                   |
| Xylose                     | 1.00 $\pm$ 0.04 | 1.13 $\pm$ 0.05                   | 1.15 $\pm$ 0.06                   | 1.00 $\pm$ 0.03                   |
| Raffinose                  | 1.00 $\pm$ 0.13 | 0.90 $\pm$ 0.08                   | 0.94 $\pm$ 0.13                   | 1.09 $\pm$ 0.20                   |
| Fructose                   | 1.00 $\pm$ 0.08 | 0.97 $\pm$ 0.06                   | 1.05 $\pm$ 0.08                   | 0.98 $\pm$ 0.08                   |
| Galactose                  | 1.00 $\pm$ 0.09 | 1.00 $\pm$ 0.06                   | 1.09 $\pm$ 0.13                   | 0.90 $\pm$ 0.13                   |
| Galactonic acid            | 1.00 $\pm$ 0.04 | 1.11 $\pm$ 0.02                   | 1.02 $\pm$ 0.04                   | 0.93 $\pm$ 0.03                   |
| Glucaric acid-1,4-lactone  | 1.00 $\pm$ 0.16 | 1.28 $\pm$ 0.13                   | 1.02 $\pm$ 0.18                   | 1.23 $\pm$ 0.17                   |
| Myo-inositol               | 1.00 $\pm$ 0.04 | 1.03 $\pm$ 0.04                   | 1.07 $\pm$ 0.05                   | 1.00 $\pm$ 0.03                   |
| Dehydroascorbate           | 1.00 $\pm$ 0.05 | 1.07 $\pm$ 0.04                   | 0.92 $\pm$ 0.05                   | 1.04 $\pm$ 0.09                   |
| Ascorbate                  | 1.00 $\pm$ 0.18 | 1.02 $\pm$ 0.10                   | 0.67 $\pm$ 0.07                   | <b>0.37 <math>\pm</math> 0.08</b> |
| Glyceraldehyde-3-phosphate | 1.00 $\pm$ 0.05 | 0.94 $\pm$ 0.04                   | 1.08 $\pm$ 0.04                   | 0.96 $\pm$ 0.05                   |
| Fructose-6-phosphate       | 1.00 $\pm$ 0.09 | 0.83 $\pm$ 0.01                   | 0.94 $\pm$ 0.04                   | 0.96 $\pm$ 0.06                   |
| Glucose-6-phosphate        | 1.00 $\pm$ 0.09 | 0.85 $\pm$ 0.03                   | 0.96 $\pm$ 0.05                   | 0.90 $\pm$ 0.06                   |
| Trehalose                  | 1.00 $\pm$ 0.02 | <b>0.88 <math>\pm</math> 0.03</b> | <b>0.84 <math>\pm</math> 0.03</b> | 0.96 $\pm$ 0.04                   |
| Tyramine                   | 1.00 $\pm$ 0.11 | 0.85 $\pm$ 0.08                   | 0.87 $\pm$ 0.06                   | <b>0.59 <math>\pm</math> 0.03</b> |
| Putrescine                 | 1.00 $\pm$ 0.07 | 0.90 $\pm$ 0.10                   | 0.85 $\pm$ 0.08                   | 0.86 $\pm$ 0.10                   |
| Spermidine                 | 1.00 $\pm$ 0.08 | 0.91 $\pm$ 0.06                   | 1.06 $\pm$ 0.05                   | 0.97 $\pm$ 0.03                   |
| Glycerol                   | 1.00 $\pm$ 0.11 | 0.87 $\pm$ 0.04                   | 0.99 $\pm$ 0.09                   | 0.91 $\pm$ 0.10                   |
| 4-hydroxy-pyridine         | 1.00 $\pm$ 0.09 | 0.88 $\pm$ 0.05                   | 1.01 $\pm$ 0.09                   | 0.86 $\pm$ 0.08                   |
| Quinic acid                | 1.00 $\pm$ 0.10 | 0.92 $\pm$ 0.06                   | 1.04 $\pm$ 0.08                   | 0.88 $\pm$ 0.09                   |
| Phosphoric acid            | 1.00 $\pm$ 0.07 | 0.93 $\pm$ 0.08                   | 1.11 $\pm$ 0.09                   | 0.97 $\pm$ 0.06                   |
| Benzoic acid               | 1.00 $\pm$ 0.25 | 0.59 $\pm$ 0.23                   | 0.99 $\pm$ 0.30                   | 0.97 $\pm$ 0.21                   |
| Uracil                     | 1.00 $\pm$ 0.08 | 0.99 $\pm$ 0.10                   | 1.07 $\pm$ 0.14                   | 0.90 $\pm$ 0.09                   |
| Urea                       | 1.00 $\pm$ 0.12 | 0.85 $\pm$ 0.07                   | 1.13 $\pm$ 0.13                   | 1.09 $\pm$ 0.08                   |
